# Supplementary material
Source: PubMed Central journal article supplement (PMC3271875)
Supplement: 1119873109_sd02.pdf [file 1119873109_sd02.pdf]

**Genomes sequences of the four viral strains used in this study**  
**HIV-NL43**

AAATCTCTAGCAGTGGCGCCCGAACAGGGACTTGAAAGCGAAAGTAAAGCCAGAGGAGA  
TCTCTCGACGCAGGACTCGGCTTGCTGAAGCGCGCACGGCAAGAGGCGAGGGGCGGCGAC  
TGGTGAGTACGCCAAAAATTTGACTAGCGGAGGCTAGAAGGAGAGAGATGGGTGCGAG  
AGCGTCGGTATTAAGCGGGGGAGAATTAGATAAATGGGAAAAAATTCGGTTAAGGCCAG  
GGGAAAGAAACAATATAAACTAAAACATATAGTATGGGCAAGCAGGGAGCTAGAACGA  
TTCGCAGTTAATCCTGGCCTTTTAGAGACATCAGAAGGCTGTAGACAAATACTGGGACA  
GCTACAACCATCCCTTCAGACAGGATCAGAAGAACTTAGATCATTATATAATACAATAG  
CAGTCCTCTATTGTGTGCATCAAAGGATAGATGTAAAAGACACCAAGGAAGCCTTAGAT  
AAGATAGAGGAAGAGCAAAACAAAAGTAAGAAAAAGGCACAGCAAGCAGCAGCTGACAC  
AGGAAACAACAGCCAGGTCAGCCAAAATTACCCTATAGTGCAGAACCTCCAGGGGCAA  
TGGTACATCAGGCCATATCACCTAGAACTTTAAATGCATGGGTAAAAGTAGTAGAAGAG  
AAGGCTTTCAGCCAGAAGTAATACCCATGTTTTTCAGCATTATCAGAAGGAGCCACCCCA  
CAAGATTTAAATACCATGCTAAACACAGTGGGGGGACATCAAGCAGCCATGCAAATGTT  
AAAAGAGACCATCAATGAGGAAGCTGCAGAATGGGATAGATTGCATCCAGTGCATGCAG  
GGCCTATTGCACCAGGCCAGATGAGAGAACCAAGGGGAAGTGACATAGCAGGAACTACT  
AGTACCCTTCAGGAACAAATAGGATGGATGACACATAATCCACCTATCCCAGTAGGAGA  
AATCTATAAAAGATGGATAATCCTGGGATTAATAAAAATAGTAAGAATGTATAGCCCTA  
CCAGCATTTCTGGACATAAGACAAGGACCAAGGAACCCTTTAGAGACTATGTAGACCGA  
TTCTATAAACTCTAAGAGCCGAGCAAGCTTCACAAGAGGTAAAAAATTGGATGACAGA  
AACCTTGTGGTCCAAAATGCGAACCCAGATTGTAAGACTATTTTAAAAGCACTGGGACC  
AGGAGCGACACTAGAAGAAATGATGACAGCATGTCAGGGAGTGGGGGGACCCGGCCATA  
AAGCAAGAGTTTTTGGCTGAAGCAATGAGCCAAGTAACAAATCCAGCTACCATAATGATA  
CAGAAAGGCAATTTTAGGAACCAAGAAAGACTGTTAAGTGTTCATTGTGGCAAAGA  
AGGGCACATAGCCAAAAATTGCAGGGCCCCTAGGAAAAAGGGCTGTTGGAAATGTGGAA  
AGGAAGGACACCAAATGAAAGATTGTAAGTACTGAGAGACAGGCTAATTTTTTAGGGAAGATC  
TGGCCTTCCACAAGGGAAGGCCAGGGAATTTTCTTCAGAGCAGACCAGAGCCAACAGCC  
CCACCAGAAGAGAGCTTCAGGTTTGGGGAAGAGACAACAACCTCCCTCTCAGAGGCAGGA  
GCCGATAGACAAGGAAGTGTATCCTTTAGCTTCCCTCAGATCACTCTTTGGCAGCGACCC  
CTCGTCACAATAAAGATAGGGGGCAATTAAGGAAGCTCTATTAGATACAGGAGCAGA  
TGATACAGTATTAGAAGAAATGAATTTGCCAGGAAGATGGAAACCAAAAATGATAGGGG  
GAATTGGAGTTTTATCAAAGTAAGACAGTATGATCAGATACTCATAGAAATCTGCGGA  
CATAAAGCTATAGGTACAGTATTAGTAGGACCTACACCTGTCAACATAATTGGAAGAAA  
TCTGTTGACTCAGATTGGCTGCACTTTAAATTTCCCATTAGTCCTATTGAGACTGTACC  
AGTAAAATTAAGCCAGGAATGGATGGCCAAAAGTTAAACAATGGCCATTGACAGAAG

AAAAAATAAAAGCATTAGTAGAAATTTGTACAGAAATGGAAAAGGAAGGAAAAATTTCC  
AAAAATTGGGCCTGAAAATCCATACAATACTCCAGTATTTGCCATAAAGAAAAAGACA  
GTACTAAATGGAGAAAATTAGTAGATTTTCAGAGAACTTAATAAGAGAACTCAAGATTTCC  
TGGGAAGTTCAATTAGGAATACCACATCCTGCAGGGTTAAAACAGAAAAAATCAGTAAC  
AGTACTGGATGTGGGCGATGCATATTTTTTCAGTTCCCTTAGATAAAGACTTCAGGAAGT  
ATACTGCATTTACCATACCTAGTATAAACAATGAGACACCAGGGATTAGATATCAGTAC  
AATGTGCTTCCACAGGGATGGAAAGGATCACCAGCAATATTCCAGTGTAGCATGACAAA  
AATCTTAGAGCCTTTTAGAAAACAAAATCCAGACGTAGTCATCTATCAATACATGGATG  
ATTTGTATGTAGGATCTGACTTAGAAAATAGGGCAGCATAGAACAAAAATAGAGGAACTG  
AGACAACATCTGTTGAGGTGGGGATTTACCACACCAGACAAAAAACATCAGAAAGAACC  
TCCATTCCCTTTGGATGGGTATGAACTCCATCCTGATAAATGGACAGTACAGCCTATAGT  
GCTGCCAGAAAAGGACAGCTGGACTGTCAATGACATACAGAAATTAGTGGGAAAATTGA  
ATTGGGCAAGTCAGATTTATGCAGGGATTAAGTAAGGCAATTATGTAAACTTCTTAGG  
GGAACCAAAGCACTAACAGAAGTAGTACCACTAACAGAAGAAGCAGAGCTAGAAGTGGC  
AGAAAACAGGGAGATTCTAAAAGAACCGGTACATGGAGTGTATTATGACCCATCAAAG  
ACTTAATAGCAGAAATACAGAAGCAGGGGCAAGGCCAATGGACATATCAAATTTATCAA  
GAGCCATTTAGAAATCTGAAAACAGGAAAGTATGCAAGAATGAAGGGTGGCCACACTAA  
TGATGTGAAACAATTAACAGAGGCAGTACAAAAAATAGCCACAGAAAGCATAGTAATAT  
GGGGAAGACTCCTAAATTTAAATTACCCATACAAAAGGAAACATGGGAAGCATGGTGG  
ACAGAGTATTGGCAAGCCACCTGGATTCCTGAGTGGGAGTTTGTCAATACCCCTCCCTTA  
GTGAAGTTATGGTACCAGTTAGAGAAAAGAACCATAATAGGAGCAGAACTTTCTATGT  
AGATGGGGCAGCCAATAGGGAAACTAAATTAGGAAAAGCAGGATATGTAAGTACAGAG  
GAAGACAAAAAGTTGTCCCCCTAACGGACACAACAAATCAGAAGACTGAGTTACAAGCA  
ATTCATCTAGCTTTGCAGGATTCGGGATTAGAAGTAAACATAGTGACAGACTCACAATA  
TGCATTGGGAATCATTCAAGCACAACCAGATAAGAGTGAATCAGAGTTAGTCAGTCAA  
TAATAGAGCAGTTAATAAAAAAGGAAAAAGTCTACCTGGCATGGGTACCAGCACACAAA  
GGAATTGGAGGAAATGAACAAGTAGATAAATTGGTCAGTGTGGAATCAGGAAAGTACT  
ATTTTTAGATGGAATAGATAAGGCCCAAGAAGAACATGAGAAATATCACAGTAATTGGA  
GAGCAATGGCTAGTGATTTTAACTACCACCTGTAGTAGCAAAGAAATAGTAGCCAGC  
TGTGATAAATGTCAGCTAAAAGGGGAAGCCATGCATGGACAAGTAGACTGTAGCCAGG  
AATATGGCAGCTAGATTGTACACATTTAGAAGGAAAAGTTATCTTGGTGGCAGTTCATG  
TAGCCAGTGGATATATAGAAGCAGAAGTAATTCAGCAGAGACAGGGCAAGAAACAGCA  
TACTTCCCTTTAAAATTAGCAGGAAGATGGCCAGTAAAAACAGTACATACAGACAATGG  
CAGCAATTTACCAGTACTACAGTTAAGGCCGCCTGTTGGTGGGCGGGAATCAAGCAGGA  
ATTTGGCATTCCCTACAATCCCCAAAGTCAAGGAGTAATAGAATCTATGAATAAAGAAT  
TAAAGAAAATTATAGGACAGGTAAGAGATCAGGCTGAACATCTTAAGACAGCAGTACAA  
ATGGCAGTATTCATCCACAATTTTAAAAGAAAAGGGGGGATTGGGGGTACAGTGCAGG  
GGAAAGAATAGTAGACATAATAGCAACAGACATACAACTAAAGAATTACAAAAACAAA  
TTACAAAATTTCAAATTTTCGGGTTTATTACAGGGACAGCAGAGATCCAGTTTGGAAA  
GGACCAGCAAAGCTCCTCTGGAAAGGTGAAGGGGCAGTAGTAATACAAGATAATAGTGA  
CATAAAAGTAGTGCCAAGAAGAAAAGCAAAGATCATCAGGGATTATGGAAAACAGATGG  
CAGGTGATGATTGTGTGGCAAGTAGACAGGATGAGGATTAACACATGGAAAAGATTAGT  
AAAACACCATATGTATATTTCAAGGAAAGCTAAGGACTGGTTTTATAGACATCACTATG  
AAAGTACTAATCCAAAAATAAGTTCAGAAGTACACATCCCCTAGGGGATGCTAAATTA  
GTAATAACAACATATTGGGGTCTGCATACAGGAGAAAGAGACTGGCATTGTTGGGTCAGGG  
AGTCTCCATAGAATGGAGGAAAAAGAGATATAGCACACAAGTAGACCCTGACCTAGCAG

ACCAACTAATTCATCTGCACTATTTTGGATTGTTTTTCAGAATCTGCTATAAGAAATACCA  
TATTAGGACGTATAGTTAGTCCTAGGTGTGAATATCAAGCAGGACATAACAAGGTAGGA  
TCTCTACAGTACTTGGCACTAGCAGCATTAAATAAAACCAAACAGATAAAGCCACCTTTG  
CCTAGTGTTAGGAAACTGACAGAGGACAGATGGAACAAGCCCCAGAAGACCAAGGGCCA  
CAGAGGGAGCCATAACAACGAATGGACACTAGAGCTTTTAGAGGAACTTAAGAGTGAAGC  
TGTTAGACATTTTCCTAGGATATGGCTCCATAACTTAGGACGACATATCTATGAAACTTA  
CGGGGATACTTGGGCAGGAGTGGAAGCCATAATAAGAATTCTGCAACAACCTGCCGTTTA  
TCCATTTTCAGAATTGGGTGTGACATAGCAGAATAGGCGTTACTCGACAGAGGAGAGCA  
AGAAATGGAGCCAGTAGATCCTAGACTAGAGCCCTGGAAGCATCCAGGAAGTCAGCCTA  
AAACTGCTTGTACCAATTGCTATTGTA AAAAGTGTGGCTTTCATTGCCAAGTTTGTTC  
TGACAAAAGCCTTAGGCATCTCCTATGGCAGGAAGAAGCGGAGACAGCGACGAAGAGCT  
CATCAGAACAGTCAGACTCATCAAGCTTCTCTATCAAAGCAGTAAGTAGTACATGTAAT  
GCAACCTATAATAGTAGCAATAGTAGCATTAGTAGTAGCAATAATAATAGCAATAGTTG  
TGTGGTCCATAGTAATCATAGAATATAGGAAAATATTAAGACAAAGAAAAATAGACAGG  
TTAATTGATAGACTAATAGAAAAGAGCAGAAGACAGTGGCAATGAGAGTGAAGGAGAAGT  
ATCAGCACTTGTGGAGATGGGGGTGGAAATGGGGCACCATGCTCCTTGGGATATTGATG  
ATCTGTAGTGCTACAGAAAAATTGTGGGTACAGTCTATTATGGGGTACCTGTGTGGAA  
GGAAGCAACCACCCTCTATTTTGTGCATCAGATGCTAAAGCATATGATACAGAGGTAC  
ATAATGTTTGGGCCACACATGCCTGTGTACCCACAGACCCCAACCCACAAGAAGTAGTAT  
TGGTAAATGTGACAGAAAATTTAACATGTGGAAAGATGACATGGTAGAACAGATGCAT  
GAGGATATAATCAGTTTATGGGATCAAAGCCTAAAGCCATGTGTAAAATTAACCCACT  
CTGTGTTAGTTTAAAGTGCCTGATTTGAAGAATGATACTAATAACCAATAGTAGTAGCG  
GGAGAATGATAATGGAGAAAGGAGAGATAAAAAACTGCTCTTTCAATATCAGCACAAAGC  
ATAAGAGATAAAGGTGCAGAAAGAATATGCATTCTTTTATAAACTTGATATAGTACCAAT  
AGATAATACCAGCTATAGGTTGATAAGTTGTAACACCTCAGTCATTACACAGGCCTGTCC  
AAAGGTATCCTTTGAGCCAATCCCATACATTATTGTGCCCCGGCTGGTTTTGCGATTCT  
AAAATGTAATAATAAGACGTTCAATGGAACAGGACCATGTACAAATGTCAGCACAGTAC  
AATGTACACATGGAATCAGGCCAGTAGTATCAACTCAACTGCTGTTAAATGGCAGTCTA  
GCAGAAGAAGATGTAGTAATTAGATCTGCCAATTTACAGACAATGCTAAAACCATAAT  
AGTACAGCTGAACACATCTGTAGAAATTAATTGTACAAGACCCAACAACAATACAAGAA  
AAAGTATCCGTATCCAGAGGGGACCAGGGAGAGCATTGTGTTACAATAGGAAAAATAGGA  
AATATGAGACAAGCACATTGTAACATTAGTAGAGCAAAATGGAATGCCACTTTAAAACA  
GATAGCTAGCAAATTAAGAGAACAATTTGGAAATAATAAAACAATAATCTTTAAGCAAT  
CCTCAGGAGGGGACCCAGAAATTGTAACGCACAGTTTTAATTGTGGAGGGGAATTTTTC  
TACTGTAATTCAACACAACCTGTTTAATAGTACTTGGTTTAATAGTACTTGGAGTACTGA  
AGGGTCAAATAACACTGAAGGAAGTGACACAATCACACTCCCATGCAGAATAAAACAAT  
TTATAAACATGTGGCAGGAAGTAGGAAAAGCAATGTATGCCCTCCCATCAGTGGACAA  
ATTAGATGTTTCAATCAATATTACTGGGCTGCTATTAACAAGAGATGGTGGTAATAACAA  
CAATGGGTCCGAGATCTTCAGACCTGGAGGAGGCGATATGAGGGACAATTGGAGAAGTG  
AATTATATAAATAATAAAGTAGTAAAAATTGAACCATTAGGAGTAGCACCCACCAAGGCA  
AAGAGAAGAGTGGTGCAGAGAGAAAAAGAGCAGTGGGAATAGGAGCTTTGTTCCTTGG  
GTTCTTGGGAGCAGCAGGAAGCACTATGGGCGCAGCGTCAATGACGCTGACGGTACAGGC  
CAGACAATTATTGTCTGATATAGTGCAGCAGCAGAACAATTTGCTGAGGGCTATTGAGG  
CGCAACAGCATCTGTTGCAACTCACAGTCTGGGGCATCAAACAGCTCCAGGCAAGAATCC  
TGGCTGTGGAAGATACCTAAAGGATCAACAGCTCCTGGGGATTTGGGGTTGCTCTGGA  
AAACTCATTTGCACCACTGCTGTGCCTTGAATGCTAGTTGGAGTAATAAATCTCTGGA

CAGATTTGGAATAACATGACCTGGATGGAGTGGGACAGAGAAATTAACAATTACACAAG  
CTTAATACACTCCTTAATTGAAGAATCGCAAACCAGCAAGAAAAGAATGAACAAGAAT  
TATTGGAATTAGATAAATGGGCAAGTTTGTGGAATTGGTTAACATAACAAATTGGCTG  
TGGTATATAAAATTATTCATAATGATAGTAGGAGGCTTGGTAGGTTTAAAGAATAGTTTT  
TGCTGTACTTTCTATAGTGAATAGAGTTAGGCAGGGATATTCACCATTATCGTTTCAGAC  
CCACCTCCCAATCCCGAGGGGACCCGACAGGCCCGAAGGAATAGAAGAAGAAGGTGGAG  
AGAGAGGCAGAGACAGATCCATTTCGATTAGTGAACGGATCCTTAGCACTTATCTGGGAC  
GATCTGCGGAGCCTGTGCCTCTTCAGCTACCACCGCTTGAGAGACTTACTCTTGATTGTA  
ACGAGGATTGTGGAACCTTCTGGGACGCAGGGGTGGGAAGCCCTCAAATATTGGTGGAA  
TCTCCTACAGTATTGGAGTCAGGAATAAAGAATAGTGCTGTTAACTTGCTCAATGCCAC  
AGCCATAGCAGTAGCTGAGGGGACAGATAGGGTTATAGAAGTATTACAAGCAGCTTATA  
GAGCTATTCGCCACATACCTAGAAGAATAAGACAGGGCTTGGAAAGGATTTTGTCTATAA  
GATGGGTGGCAAGTGGTCAAAAAGTAGTGTGATTGGATGGCCTGCTGTAAGGGAAAGAA  
TGAGACGAGCTGAGCCAGCAGCAGATGGGGTGGGAGCAGTATCTCGAGACCTAGAAAAA  
CATGGAGCAATCACAAGTAGCAATACAGCAGCTAACAAATGCTGCTTGTGCCTGGCTAGA  
AGCACAAGAGGAGGAAGAGGTGGGTTTTCCAGTCACACCTCAGGTACCTTAAAGACCAA  
TGACTTACAAGGCAGCTGTAGATCTTAGCCACTTTTTAAAAGAAAAGGGGGGACTGGAA  
GGGCTAATTCCTCCCAAAGAAGACAAGATATCCTTGATCTGTGGATCTACCACACACAA  
GGCTACTTCCCTGATTGGCAGAATAACACCAGGGCCAGGGGTGAGATATCCACTGACC  
TTTGGATGGTGTACAAGCTAGTACCAGTTGAGCCAGATAAGGTAGAAGAGGCCAATAA  
AGGAGAGAACACCAGCTTGTACACCCTGTGAGCCTGCATGGAATGGATGACCCTGAGAG  
AGAAGTGTTAGAGTGGAGGTTTGACAGCCGCTAGCATTTCATCACGTGGCCCGAGAGCT  
GCATCCGGAGTACTTCAAGAACTGCTGACATCGAGCTTGCTACAAGGGACTTTCGCTGG  
GGACTTTCAGGGAGGCGTGGCCTGGGCGGGACTGGGGAGTGGCGAGCCCTCAGATGCTG  
CATATAAGCAGCTGCTTTTTGCCTGTACTGGGTCTCTCTGGTTAGACCAGATCTGAGCCT  
GGGAGCTCTCTGGCTAACTAGGGAACCCACTGCTTAAGCCTCAATAAAGCTTGCCTTGAG  
GGC

### **HCV-JFH1**

ACCTGCCCTAATAGGGGCGACACTCCGCCATGAATCACTCCCCTGTGAGGAACTACTGT  
CTTCACGCAGAAAGCGCCTAGCCATGGCGTTAGTATGAGTGTCGTACAGCCTCCAGGCC  
CCCCCTCCCGGAGAGCCATAGTGGTCTGCGGAACCGGTGAGTACACCGGAATTGCCGGG  
AAGACTGGGTCTTTCTTGATAAACCCTCTATGCCCGGCCATTTGGGCGTGCCCCCG  
CAAGACTGCTAGCCGAGTAGCGTTGGGTTGCGAAAGGCCTTGTGGTACTGCCTGATAGGG  
CGCTTGCGAGTGCCCCGGGAGGTCTCGTAGACCGTGCACCATGAGCACAAATCCTAAACC  
TCAAAGAAAAACCAAAGAAACACCAACCGTCGCCAGAAAGACGTTAAGTTCCCGGGCG  
GCGGCCAGATCGTTGGCGGAGTATACTTGTGCGCGCAGGGGCCCCAGGTTGGGTGTGC  
GCACGACAAGGAAACTTCGGAGCGGTCCAGCCACGTGGGAGACGCCAGCCCATCCCCA  
AAGATCGGCGCTCCACTGGCAAGGCCTGGGGAAAACCAGGTCGCCCTGGCCCCTATATG  
GGAATGAGGGACTCGGCTGGGCAGGATGGCTCCTGTCCCCCGAGGCTCTCGCCCCTCCT  
GGGGCCCCACTGACCCCCGGCATAGGTGCGGCAACGTGGGTAAAGTCATCGACACCCTAA  
CGTGTGGCTTTGCCGACCTCATGGGGTACATCCCCGTCTAGGCGCCCCGCTTAGTGGCG  
CCGCCAGAGCTGTGCGCACGGCGTGAGAGTCTGGAGGACGGGTTAATTATGCAACAG  
GGAACCTACCCGTTTTCCCTTTTTCTATCTTCTTGGCTGGCCCTGTTGTCCTGCATCACCGT  
TCCGGTCTCTGCTGCCAGGTGAAGAATACCAGTAGCAGCTACATGGTGACCAATGACTG

CTCCAATGACAGCATCACTTGGCAGCTCGAGGCTGCGGTTCTCCACGTCCCCGGGTGCGT  
CCCGTGGGAGAGAGTGGGGAATACGTCACGGTGTGGGTGCCAGTCTCGCCAAACATGGC  
TGTGCGGCAGCCCGGTGCCCTCACGCAGGGTCTGCGGACGCACATCGATATGGTTGTGAT  
GTCCGCCACCTTCTGCTCTGCTCTACGTGGGGGACCTCTGTGGCGGGGTGATGCTCGC  
GGCCAGGTGTTTCATCGTCTCGCCGCAGTACCACTGGTTTGTGCAAGAATGCAATTGCTC  
CATCTACCCTGGCACCATCACTGGACACCGCATGGCATGGGACATGATGATGAACTGGTC  
GCCACGGCCACCATGATCCTGGCGTACGTGATGCGCGTCCCCGAGGTCATCATAGACAT  
CGTTAGCGGGGCTCACTGGGGCGTCATGTTGCGCTTGGCCTACTTCTCTATGCAGGGAGC  
GTGGGCGAAGGTCATTGTCATCCTTCTGCTGGCCGCTGGGGTGGACGCGGGCACCACCAC  
CGTTGGAGGCGCTGTTGCACGTTCCACCAACGTGATTGCCGGCGTGTTCAGCCATGGCCC  
TCAGCAGAACATTCAGCTCATTAACACCAACGGCAGTTGGCACATCAACCGTACTGCCTT  
GAATTGCAATGACTCCTTGAACACCGGCTTTCTCGCGGCCTTGTCTACACCAACCGCTT  
TAACTCGTCAGGGTGTCCAGGGCGCCTGTCCGCCTGCCGCAACATCGAGGCTTTCGGAT  
AGGGTGGGGCACCCCTACAGTACGAGGATAATGTCACCAATCCAGAGGATATGAGGCCGT  
ACTGCTGGCACTACCCCCAAAGCCGTGTGGCGTAGTCCCCGCGAGGTCTGTGTGTGGCC  
CAGTGTACTGTTTCACCCCCAGCCCGTAGTAGTGGGCACGACCGACAGACGTGGAGTGC  
CCACCTACACATGGGGAGAGAATGAGACAGATGTCTTCTACTGAACAGCACCCGACCGC  
CGCAGGGCTCATGGTTCGGCTGCACGTGGATGAACTCCACTGGTTTCACCAAGACTTGTG  
GCGCGCCACCTTGCCGCACCAGAGCTGACTTCAACGCCAGCACGGACTTGTGTGCCCTA  
CGGATTGTTTTAGGAAGCATCCTGATGCCACTTATATTAAGTGTGGTTCTGGGCCCTGGC  
TCACACCAAAGTGCCTGGTCCACTACCCTTACAGACTCTGGCATTACCCCTGCACAGTCA  
ATTTTACCATCTTCAAGATAAGAATGTATGTAGGGGGGGTTGAGCACAGGCTCACGGCC  
GCATGCAACTTCACTCGTGGGGATCGCTGCGACTTGGAGGACAGGGACAGGAGTCAGCTG  
TCTCCTCTGTTGCACTCTACCACGGAATGGGCCATCCTGCCCTGCACCTACTCAGACTTAC  
CCGCTTTGTCAACTGGTCTTCTCCACCTTACCAGAACATCGTGGACGTACAATACATGT  
ATGGCCTCTCACCTGCTATCACAAAATACGTCGTTTCGATGGGAGTGGGTGGTACTCTTAT  
TCTGCTCTTAGCGGACGCCAGAGTCTGCGCCTGCTTGTGGATGCTCATCTTGTGGGCC  
AGGCCGAAGCAGCATTGGAGAAGTTGGTTCGCTTGCACGCTGCGAGTGCGGCTAACTGCC  
ATGGCCTCCTATATTTTGCATCTTCTTCGTGGCAGCTTGGCACATCAGGGGTGGGTGG  
TCCCCTTGACCACCTATTGCCTCACTGGCCTATGGCCCTTCTGCCTACTGCTCATGGCACT  
GCCCCGGCAGGCTTATGCCTATGACGCACCTGTGCACGGACAGATAGGCGTGGGTTTGT  
GATATTGATCACCTCTTCACTCACCCCGGGTATAAGACCCTCCTCGGCCAGTGTCT  
GTGGTGGTTGTGCTATCTCCTGACCCTGGGGGAAGCCATGATTCAGGAGTGGGTACCACC  
CATGCAGGTGCGCGGCGGCCGCGATGGCATCGCGTGGGCCGTCACTATATTCTGCCCGGG  
TGTGGTGTGTTGACATTACCAAATGGCTTTTGGCGTTGCTTGGGCCTGCTTACCTCTTAA  
GGCCGCTTTGACACATGTGCCGTACTTTCGTCAGAGCTCACGCTCTGATAAGGGTATGCGC  
TTTGGTGAAGCAGCTCGCGGGGGTAGGTATGTTGAGGTGGCGCTATTGGCCCTTGGCAG  
GTGGACTGGCACCTACATCTATGACCACCTCACACCTATGTCGGACTGGGCCGCTAGCGG  
CCTGCGGACTTAGCGGTGCGCGTGGAACCCATCATCTTTCAGTCCGATGGAGAAGAAGT  
CATCGTCTGGGGAGCGGAGACGGCTGCATGTGGGGACATTCTACATGGACTTCCCGTGT  
CGCCGACTCGGCCAGGAGATCCTCCTCGGCCAGCTGATGGCTACACCTCCAAGGGGTG  
GAAGCTCCTTGCTCCCATCACTGCTTATGCCAGCAAACACGAGGCCTCCTGGGCGCCAT  
AGTGGTGAAGTATGACGGGGCGTGACAGGACAGAACAGGCCGGGGAAGTCCAAATCCTGT  
CCACAGTCTCTCAGTCTTCCCTCGGAACAACCATCTCGGGGGTTTTGTGGACTGTTTACC  
ACGGAGCTGGCAACAAGACTCTAGCCGGCTTACGGGGTCCGGTCACGCAGATGTACTCGA  
GTGCTGAGGGGGACTTGGTAGGCTGGCCAGCCCCCTGGGACCAAGTCTTTGGAGCCGT

GCAAGTGTGGAGCCGTCGACCTATATCTGGTCACGCGGAACGCTGATGTCATCCCGGCTC  
GGAGACGCGGGGACAAGCGGGGAGCATTGCTCTCCCCGAGACCCATTTTCGACCTTGAAGG  
GGTCCTCGGGGGGGCCGGTGTCTGCCCTAGGGGCCACGTCGTTGGGCTCTTCCGAGCAG  
CTGTGTGCTCTCGGGGCGTGGCCAAATCCATCGATTTTCATCCCCGTTGAGACACTCGACG  
TTGTTACAAGGTCTCCCACTTTTCAGTGACAACAGCACGCCACCGGCTGTGCCCCAGACCT  
ATCAGGTGCGGTACTTGCATGCTCCAACCTGGCAGTGGAAAGAGCACCAAGGTCCCTGTGC  
CGTATGCCGCCAGGGGTACAAAGTACTAGTGCTTAACCCCTCGGTAGCTGCCACCCTGG  
GGTTTGGGGCGTACCTATCCAAGGCACATGGCATCAATCCCAACATTAGGACTGGAGTCA  
GGACCGTGATGACCGGGGAGGCCATCACGTACTCCACATATGGCAAATTTCTCGCCGATG  
GGGGCTGCGCTAGCGGCGCCTATGACATCATCATATGCGATGAATGCCACGCTGTGGATG  
CTACCTCCATTCTCGGCATCGGAACGGTCCCTTGATCAAGCAGAGACAGCCGGGGTCAAGC  
TAACTGTGCTGGCTACGGCCACACCCCCGGGTGAGTGACAACCCCCCATCCCGATATAG  
AAGAGGTAGGCCTCGGGCGGGAGGGTGAAGATCCCCTTCTATGGGAGGGCGATTCCCCTAT  
CCTGCATCAAGGGAGGGAGACACCTGATTTTCTGCCACTCAAAGAAAAAGTGTGACGAG  
CTCGCGGGGCCCTTCGGGGCATGGGCTTGAATGCCGTGGCATACTATAGAGGGTTGGAC  
GTCTCCATAATACCAGCTCAGGGAGATGTGGTGGTTCGTCGCCACCGACGCCCTCATGACG  
GGGTACACTGGAGACTTTGACTCCGTGATCGACTGCAATGTAGCGGTCACCCAAGCTGTC  
GACTTCAGCCTGGACCCACCTTCACTATAACCACACAGACTGTCCACAAGACGCTGTC  
TCACGCAGTCAGCGCCGCGGGCGCACAGGTAGAGGAAGACAGGGCACTTATAGGTATGTT  
TCCACTGGTGAACGAGCCTCAGGAATGTTTGACAGTGTAGTGCTTTGTGAGTGCTACGAC  
GCAGGGGTGCGTGGTACGATCTCACACCAGCGGAGACCACCGTCAGGCTTAGAGCGTAT  
TTCAACACGCCCGGCCTACCCGTGTGTCAAGACCATCTTGAATTTTGGGAGGCAGTTTTC  
ACCGGCCTCACACACATAGACGCCCACTTCTCTCCCAAACAAGCAAGCGGGGGAGAAC  
TTCGCGTACCTAGTAGCCTACCAAGCTACGGTGTGCGCCAGAGCCAAGGCCCTCCCCCG  
TCCTGGGACGCCATGTGGAAGTGCCTGGCCCCGACTCAAGCCTACGCTTGGCGGGCCCCACA  
CCTCTCCTGTACCGTTTGGGCCCTATTACCAATGAGGTCACCCTCACACACCCTGGGACG  
AAGTACATCGCCACATGCATGCAAGCTGACCTTGAGGTCATGACCAGCACGTGGGTCCTA  
GCTGGAGGAGTCCTGGCAGCCGTCGCCGCATATTGCCTGGCGACTGGATGCGTTTCCATC  
ATCGGCCGCTTGCACGTCAACCAGCGAGTCGTGCTTGGCCGGATAAGGAGGTCCTGTAT  
GAGGCTTTTGTGAGATGGAGGAATGCGCCTCTAGGGCGGCTCTCATCGAAGAGGGGCA  
GCGGATAGCCGAGATGTTGAAGTCCAAGATCCAAGGCTTGTGTCAGCAGGCCTCTAAGCA  
GGCCCAGGACATAACAACCGCTATGCAGGCTTTCATGGCCCAAAGTGAACAATTTTGGGC  
CAGACACATGTGGAACCTCATTAGCGGCATCCAATACCTCGCAGGATTGTCAACACTGCC  
AGGGAACCCCGCGGTGGCTTCCATGATGGCATTTCAGTGCCGCCCTCACAGTCCGTTGTC  
GACCAGTACCACCATCCTTCTCAACATCATGGGAGGCTGGTTAGCGTCCCAGATCGCACC  
ACCCGCGGGGGCCACCGGCTTTGTGCTCAGTGGCCTGGTGGGGGCTGCCGTGGGCAGCAT  
AGGCCTGGGTAAGGTGCTGGTGGACATCCTGGCAGGATATGGTGGCGGCATTTCCGGGGG  
CCTCGTCGCATTCAAGATCATGTCTGGCGAGAAGCCCTCTATGGAAGATGTCATCAATCT  
ACTGCCTGGGATCCTGTCTCCGGGAGCCCTGGTGGTGGGGGTCATCTGCGCGGCCATTCT  
GCGCCGCCACGTGGGACCGGGGGAGGGCGCGGTCCAATGGATGAACAGGCTTATTGCCTT  
TGCTTCCAGAGGAAACCACGTGCCCCCTACTCACTACGTGACGGAGTCGGATGCGTCGCA  
GCGTGTGACCCAACCTACTTGGCTCTCTTACTATAACCAGCCTACTCAGAAGACTCCACAA  
TTGGATAACTGAGGACTGCCCCATCCCATGCTCCGGATCCTGGCTCCGCGACGTGTGGGA  
CTGGGTTTGCACCATCTTGACAGACTTCAAAAATTGGCTGACCTCTAAATTGTTCCCAA  
GCTGCCCGGCCTCCCCTTCATCTCTTGTCAAAGGGGTACAAGGGTGTGTGGGCCGGCAC  
TGGCATCATGACCACGCGCTGCCCTTGGCGGCCAACATCTCTGGCAATGTCCGCCTGGG

CTCTATGAGGATCACAGGGCCTAAAACCTGCATGAACACCTGGCAGGGGACCTTTCCTAT  
CAATTGCTACACGGAGGGCCAGTGC GCGCCGAAACCCCCACGAACTACAAGACCGCCAT  
CTGGAGGGTGGCGGCCTCGGAGTACGCGGAGGTGACGCAGCATGGGTCTACTCCTATGT  
AACAGGACTGACCACTGACAATCTGAAAATTCCTTGCCAACTACCTTCTCCAGAGTTTTT  
CTCCTGGGTGGACGGTGTGCAGATCCATAGGTTTGCACCCACACCAAAGCCGTTTTTCCG  
GGATGAGGTCTCGTTCTGCGTTGGGCTTAATTCCTATGCTGTGCGGTCCCAGCTTCCCTG  
TGAACCTGAGCCCGACGCAGACGTATTGAGGTCCATGCTAACAGATCCGCCCCACATCAC  
GGCGGAGACTGCGGGCGGGCGCTTGGCACGGGGATCACCTCCATCTGAGGCGAGCTCCTC  
AGTGAGCCAGCTATCAGCACCGTCGCTGCGGGCCACCTGCACCACCCACAGCAACACCTA  
TGACGTGGACATGGTCGATGCCAACCTGCTCATGGAGGGCGGTGTGGCTCAGACAGAGCC  
TGAGTCCAGGGTGCCCGTTCTGGACTTCTCGAGCCAATGGCCGAGGAAGAGAGCGACCT  
TGAGCCCTCAATACCATCGGAGTGCATGCTCCCCAGGAGCGGGTTTCCACGGGCCTTACC  
GGCTTGGGCACGGCCTGACTACAACCCGCGCTCGTGGAATCGTGGAGGAGGCCAGATTA  
CCAACCGCCACCGTTGCTGGTTGTGCTCTCCCCCCCCAAGAAGGCCCGACGCCTCCC  
CCAAGGAGACGCCGACAGTGGGTCTGAGCGAGAGCACCATATCAGAAGCCCTCCAGCAA  
CTGGCCATCAAGACCTTTGGCCAGCCCCCTCGAGCGGTGATGCAGGCTCGTCCACGGGG  
GCGGGCGCCGCGAATCCGGCGGTCCGACGTCCCCTGGTGAGCCGGCCCCCTCAGAGACA  
GGTTCGCTCCTCTATGCCCCCCCTCGAGGGGGAGCCTGGAGATCCGGACCTGGAGTCT  
GATCAGGTAGAGCTTCAACCTCCCCCCAGGGGGGGGGGTAGCTCCCGTTTCGGGCTCG  
GGGTCTTGGTCTACTTGTCTCCGAGGAGGACGATACCACCGTGTGCTGCTCCATGTCATA  
TCCTGGACCGGGGCTCTAATAACTCCCTGTAGCCCCGAAGAGGAAAAGTTGCCAATCAAC  
CCTTTGAGTAACTCGCTGTTGCGATACCATAACAAGGTGTACTGTACAACATCAAAGAGC  
GCCTCACAGAGGGCTAAAAAGGTAACTTTTGACAGGACGCAAGTGCTCGACGCCATTAT  
GACTCAGTCTTAAAGGACATCAAGCTAGCGGCTTCCAAGGTCAGCGCAAGGCTCCTCACC  
TTGGAGGAGGCGTGCCAGTTGACTCCACCCCATTCTGCAAGATCCAAGTATGGATTTCGGG  
GCCAAGGAGGTCCGCAGCTTGTCCGGGAGGGCCGTTAACCACATCAAGTCCGTGTGGAAG  
GACCTCCTGGAAGACCCACAACACCAATTCCCACAACCATCATGGCCAAAAATGAGGTG  
TTCTGCGTGGACCCCGCAAGGGGGTAAGAAACCAGCTCGCCTCATCGTTTTACCCTGAC  
CTCGGCGTCCGGGTCTGCGAGAAAATGGCCCTCTATGACATTACACAAAAGCTTCCCTCAG  
GCGGTAATGGGAGCTTCTATGGCTTCCAGTACTCCCCTGCCCAACGGGTGGAGTATCTC  
TTGAAAGCATGGGCGGAAAAGAAGACCCCATGGGTTTTTTCGTATGATACCCGATGCTTC  
GACTCAACCGTCACTGAGAGAGACATCAGGACCGAGGAGTCCATATAACCAGGCCTGCTCC  
CTGCCCAGGAGGCCCGCACTGCCATACACTCGCTGACTGAGAGACTTTACGTAGGAGGG  
CCCATGTTCAACAGCAAGGGTCAAACCTGCGGTTACAGACGTTGCCGCGCCAGCGGGGTG  
CTAACCACTAGCATGGGTAACACCATCACATGCTATGTGAAAGCCCTAGCGGCCTGCAAG  
GCTGCGGGGATAGTTGCGCCACAATGCTGGTATGCGGCGATGACCTAGTAGTCATCTCA  
GAAAGCCAGGGGACTGAGGAGGACGAGCGGAACCTGAGAGCCTTCACGGAGGCCATGAC  
CAGGTA CTCTGCCCCTCTGGTGATCCCCCAGACCGGAATATGACCTGGAGCTAATAAC  
ATCCTGTTCTCAAATGTGTCTGTGGCGTTGGGCCCCGCGGGGCCGCGAGATACTACCT  
GACCAGAGACCCAACCACTCCACTCGCCGGGCTGCCTGGGAAACAGTTAGACACTCCCC  
TATCAATTCATGGCTGGGAAACATCATCCAGTATGCTCCAACCATATGGGTTTCGCATGGT  
CCTAATGACACACTTCTTCTCCATTCTCATGGTCCAAGACACCCTGGACCAGAACCTCAA  
CTTTGAGATGTATGGATCAGTATACTCCGTGAATCCTTTGGACCTTCCAGCCATAATTGA  
GAGGTTACACGGGCTTGACGCCTTTTCTATGCACACATACTCTCACCACGAACTGACGCG  
GGTGGCTTCAGCCCTCAGAAAACCTGGGGCGCCACCCCTCAGGGTGTGGAAGAGTCCGGC  
TCGCGCAGTCAGGGCGTCCCTCATCTCCCGTGGAGGGAAAGCGGCCGTTTTGCGGCCGATA

TCTCTTCAATTGGGCGGTGAAGACCAAGCTCAAACCTCACTCCATTGCCGGAGGCGCGCCT  
ACTGGACTTATCCAGTTGGTTCACCGTCGGCGCCGGCGGGGGCGACATTTTTTTCACAGCGT  
GTCGCGCGCCCGACCCCGCTCATTACTCTTCGGCCTACTCCTACTTTTTTCGTAGGGGTAGGC  
CTCTTCTACTCCCGCTCGGTAGAGCGGCACACACTAGGTACACTCCATAGCTAACTGT  
TCCTTTTTTTTTTTTTTTTTTTTTTTTTTTTTTTTTTTTTTTTTTTTTTTTTTTTTTTTTTTTT  
TCCCTCTTCTTCCCTTCTCATCTTATTCTACTTTCTTTCTTGGTGGCTCCATCTTAGCCC  
TAGTCACGGCTAGCTGTGAAAGGTCCGTGAGCCGCATGACTGCAGAGAGTGCCGTAAC TG  
GTCTCTCTGCAGATCATGT

## **Influenza A-PR8**

### **S1**

AGCGAAAGCAGGTCAATTATATTCAATATGGAAAGAATAAAAGA ACTAAGAAATCTAAT  
GTCGCAGTCTCGCACCCGCGAGATACTCACAAAACCACCGTGGACCATATGGCCATAAT  
CAAGAAGTACACATCAGGAAGACAGGAGAAGAACCAGCACTTAGGATGAAATGGATGA  
TGGCAATGAAATATCCAATTACAGCAGACAAGAGGATAACGGAAATGATTCCTGAGAGA  
AATGAGCAAGGACAACTTTATGGAGTAAAATGAATGATGCCGGATCAGACCGAGTGAT  
GGTATCACCTCTGGCTGTGACATGGTGAATAGGAATGGACCAATGACAAATACAGTTC  
ATTATCCAAAATCTACAAACTTATTTTGAAGAGTCGAAAGGCTAAAGCATGGAACC  
TTTGGCCCTGTCCATTTTAGAAACCAAGTCAAATACGTCGGAGAGTTGACATAAATCCT  
GGTCATGCAGATCTCAGTGCCAAGGAGGCACAGGATGTAATCATGGAAGTTGTTTTCCCT  
AACGAAGTGGGAGCCAGGATACTAACATCGGAATCGCAACTAACGATAACCAAAGAGAA  
GAAAGAAGAACTCCAGGATTGCAAAATTTCTCCTTTGATGGTTGCATACATGTTGGAGA  
GAGAACTGGTCCGCAAAACGAGATTCCCTCCAGTGGCTGGTGAACAAGCAGTGTGTACA  
TTGAAGTGTTGCATTTGACTCAAGGAACATGCTGGGAACAGATGTATACTCCAGGAGGG  
GAAGTGAAGAATGATGATGTTGATCAAAGCTTGATTATTGCTGCTAGGAACATAGTGAG  
AAGAGCTGCAGTATCAGCAGACCCACTAGCATCTTTATTGGAGATGTGCCACAGCACACA  
GATTGGTGGAATTAGGATGGTAGACATCCTTAAGCAGAACCCAACAGAAGAGCAAGCCG  
TGGGTATATGCAAGGCTGCAATGGGACTGAGAATTAGCTCATCCTTCAGTTTTGGTGGA  
TTCACATTTAAGAGAACAAGCGGATCATCAGTCAAGAGAGAGGAAGAGGTGCTTACGGG  
CAATCTTCAAACATTGAAGATAAGAGTGCATGAGGGATATGAAGAGTTCACAATGGTTG  
GGAGAAGAGCAACAGCCATACTCAGAAAAGCAACCAGGAGATTGATTCAGCTGATAGTG  
AGTGGGAGAGACGAACAGTCGATTGCCGAAGCAATAATTGTGGCCATGGTATTTTACA  
AGAGGATTGTATGATAAAAGCAGTTAGAGGTGATCTGAATTTTCGTCAATAGGGCGAATC  
AGCGACTGAATCCTATGCATCAACTTTTAAGACATTTTCAGAAGGATGCGAAAGTGCTT  
TTTCAAATTTGGGGAGTTGAACCTATCGACAATGTGATGGGAATGATTGGGATATTGCC  
CGACATGACTCCAAGCATCGAGATGTCAATGAGAGGAGTGAGAATCAGCAAAATGGGTG  
TAGATGAGTACTCCAGCACGGAGAGGGTAGTGGTGGAGATTGACCGGTTCTTGAGAGTC  
CGGACCAACGAGGAAATGTACTACTGTCTCCCGAGGAGGTCAGTGAAACACAGGGAAC  
AGAGAACTGACAATAACTTACTCATCGTCAATGATGTGGGAGATTAATGGTCCCTGAAT  
CAGTGTTGGTCAATACCTATCAATGGATCATCAGAACTGGGAACTGTTAAAATTCAG  
TGGTCCCAGAACCCTACAATGCTATAACAATAAAATGGAATTTGAACCATTTTCACTCTTA  
GTACCTAAGGCCATTAGAGGCCAATACAGTGGGTTTTGTGAGAACTCTGTTCCAACAAAT  
GAGGGATGTGCTTGGGACATTTGATACCGCACAGATAATAAACTTCTTCCCTTCGCAGC  
CGCTCCACCAAAGCAAAGTAGAATGCAGTTCTCCTCATTTACTGTGAATGTGAGGGGATC  
AGGAATGAGAATACTTGTAAGGGGCAATTTCTCCTGTATTCAACTACAACAAGGCCACGA  
AGAGACTCACAGTTCTCGGAAAGGATGCTGGCACTTTAACCGAAGACCCAGATGAAGGC



ACAGCTGGAGTGGAGTCCGCTGTTCTGAGGGGATTCTCATTCTGGGCAAAGAAGACAG  
GAGATATGGGCCAGCATTAAAGCATCAATGAACTGAGCAACCTTGGCGAAAGGAGAGAAGG  
CTAATGTGCTAATTGGGCAAGGAGACGTGGTGTGGTAATGAAACGAAAACGGGACTCT  
AGCATACTTACTGACAGCCAGACAGCGACCAAAAAGAATTTCGGATGGCCATCAATTAGTG  
TCGAATAGTTTAAAAACGACCTTGTCTACT

**S2**

AGCGAAAGCAGGCAAACCATTTGAATGGATGTCAATCCGACCTTACTTTTTCTTAAAAGT  
GCCAGCACAAAATGCTATAAGCACAACCTTTCCCTTATACCGGAGACCTCCTTACAGCCA  
TGGGACAGGAACAGGATACACCATGGATACTGTCAACAGGACACATCAGTACTCAGAAA  
AGGCAAGATGGACAACAAACACCGAAACTGGAGCACCGCAACTCAACCCGATTGATGGGC  
CACTGCCAGAAGACAATGAACCAAGTGGTTATGCCCAAACAGATTGTGTATTGGAAGCA  
ATGGCTTTCCTTGAGGAATCCCATCCTGGTATTTTTGAAAACCTCGTGTATTGAAACGATG  
GAGGTTGTTTCAGCAAACACGAGTAGACAAGCTGACACAAGGCCGACAGACCTATGACTG  
GACTTTAAATAGAAACCAGCCTGCTGCAACAGCATTGGCCAACACAATAGAAGTGTTCA  
GATCAAATGGCCTCACGGCCAATGAGTCTGGAAGGCTCATAGACTTCCTTAAGGATGTAA  
TGGAGTCAATGAAAAAAGAAGAAATGGGGATCACAACCTCATTTCAGAGAAAGAGACGG  
GTGAGAGACAATATGACTAAGAAAATGATAACACAGAGAACAATAGGTAAGGAAACA  
GAGATTGAACAAAAGGAGTTATCTAATTAGAGCATTGACCCTGAACACAATGACCAAAG  
ATGCTGAGAGAGGGAAGCTAAAACGGAGAGCAATTGCAACCCAGGGATGCAAATAAGG  
GGTTTTGTATACTTTGTTGAGACACTGGCAAGGAGTATATGTGAGAACTTGAACAATC  
AGGTTTGCAGTTGGAGGCAATGAGAAGAAAGCAAAGTTGGCAAATGTTGTAAGGAAGA  
TGATGACCAATTCTCAGGACACCGAACTTCTTTGACCATCACTGGAGATAACACCAAAT  
GGAACGAAAATCAGAATCCTCGGATGTTTTTGGCCATGATCACATATATGACCAGAAAT  
CAGCCCGAATGGTTCAGAAATGTTCTAAGTATTGCTCCAATAATGTTCTCAAACAAAAT  
GGCGAGACTGGGAAAAGGTATATGTTTGGAGAGCAAGAGTATGAAACTTAGAACTCAA  
TACCTGCAGAAATGCTAGCAAGCATTGATTTGAAATATTTCAATGATTCAACAAGAAAG  
AAGATTGAAAAAATCCGACCGCTCTTAATAGAGGGGACTGCATCATTGAGCCCTGGAAT  
GATGATGGGCATGTTCAATATGTTAAGCACTGTATTAGGCGTCTCCATCCTGAATCTTGG  
ACAAAAGAGATACACCAAGACTACTTACTGGTGGGATGGTCTTCAATCCTCTGACGATTT  
TGCTCTGATTGTGAATGCACCCAATCATGAAGGGATTCAAGCCGGAGTCGACAGGTTTTA  
TCGAACCTGTAAGCTACATGGAATCAATATGAGCAAGAAAAAGTCTTACATAAACAGAA  
CAGGTACATTTGAATTCACAAGTTTTTTCTATCGTTATGGGTTTGTGCCAATTTAGCA  
TGGAGCTTCCCAGTTTTGGTGTGTCTGGGAGCAACGAGTCAGCGGACATGAGTATTGGA  
GTTACTGTATCAAAAACAATATGATAAACAATGATCTTGGTCCAGCAACAGCTCAAAT  
GGCCCTCAGTTGTTTCATCAAAGATTACAGGTACACGTACCGATGCCATAGAGGTGACAC  
ACAAATACAAACCCGAAGATCATTTGAAATAAAGAAACTGTGGGAGCAAACCCGTTCCA  
AAGCTGGACTGCTGGTCTCCGACGGAGGCCAAATTTATACAACATTAGAAATCTCCACA  
TTCCTGAAGTCTGCCTAAAATGGGAATTGATGGATGAGGATTACCAGGGGCGTTTATGC  
AACCCACTGAACCCATTTGTGAGCCATAAAGAAATTGAATCAATGAACAATGCAGTGAT  
GATGCCAGCACATGGTCCAGCCAAAACATGGAGTATGATGCTGTTGCAACAACACACTC  
CTGGATCCCCAAAAGAAATCGATCCATCTTGAATACAAGTCAAAGAGGAGTACTTGAAG  
ATGAACAAATGTACCAAAGGTGCTGCAATTTATTTGAAAAATTCTTCCCCAGCAGTTCA  
TACAGAAGACCAGTCGGGATATCCAGTATGGTGGAGGCTATGGTTTCCAGAGCCCGAAT  
TGATGCACGGATTGATTTTGAATCTGGAAGGATAAAGAAAAGAAGAGTTCACTGAGATCA  
TGAAGATCTGTTCCACCATTGAAGAGCTCAGACGGCAAAAATAGTGAATTTAGCTTGTC  
CTTCATGAAAAAATGCCTTGTTCTACT

**S3**

AGCGAAAGCAGGTAAGTCCAAAATGGAAGATTTTGTGCGACAATGCTTCAATCCGAT  
GATTGTCGAGCTTGC GGAAAAACAATGAAAGAGTATGGGGAGGACCTGAAAATCGAAA  
CAAACAAATTTGCAGCAATATGCACTCACTTGGAAAGTATGCTTCATGTATTCAGATTTCC  
ACTTCATCAATGAGCAAGGCGAGTCAATAATCGTAGAACTTGGTGTATCCTAATGCACTTT  
TGAAGCACAGATTTGAAATAATCGAGGGAAGAGATCGCACAAATGGCCTGGACAGTAGTA  
AACAGTATTTGCAACACTACAGGGGCTGAGAAACCAAAGTTTCTACCAGATTTGTATGA  
TTACAAGGAAAATAGATTCATCGAAATTGGAGTAACAAGGAGAGAAGTTCACATATACT  
ATCTGGAAAAGGCCAATAAAATTAATCTGAGAAAACACACATCCACATTTTCTCGTTC  
ACTGGGGAAGAAATGGCCACAAAGGCCGACTACACTCTCGATGAAGAAAGCAGGGCTAG  
GATCAAAACCAGGCTATTCACCATAAGACAAGAAATGGCCAGCAGAGGCCTCTGGGATT  
CCTTTCGTCAGTCCGAGAGAGGAGAAGAGACAATTGAAGAAAGGTTTGAATCACAGGA  
ACAATGCGCAAGCTTGCCGACCAAAGTCTCCCGCCGAACTTCTCCAGCCTTGAAAATTTT  
AGAGCCTATGTGGATGGATTGGAACCGAACGGCTACATTGAGGGCAAGCTGTCTCAAAT  
GTCCAAAGAAGTAAATGCTAGAATTGAACCTTTTTTGA AAAACAACACCACGACCACTTA  
GACTTCCGAATGGGCCTCCCTGTTCTCAGCGGTCCAAATTCCTGCTGATGGATGCCTTAA  
AATTAAGCATTGAGGACCAAGTCAATGAAGGAGAGGGAATACCGCTATATGATGCAATC  
AAATGCATGAGAACATTCCTTGGATGGAAGGAACCCAATGTTGTTAAACCACACGAAAA  
GGGAATAAATCCAAATTATCTTCTGTCATGGAAGCAAGTACTGGCAGA ACTGCAGGACA  
TTGAGAATGAGGAGAAAATTCCAAGACTAAAAATATGAAAAAACAAGTCAGCTAAAG  
TGGGCACTTGGTGAGAACATGGCACCAGAAAAGGTAGACTTTGACGACTGTAAAGATGT  
AGGTGATTTGAAGCAATATGATAGTGATGAACCAGAATTGAGGTCGCTTGCAAGTTGGA  
TTCAGAATGAGTTCAACAAGGCATGCGAACTGACAGATTCAAGCTGGATAGAGCTTGAT  
GAGATTGGAGAAGATGTGGCTCCAATTGAACACATTGCAAGCATGAGAAGGAATTATTT  
CACATCAGAGGTGTCTCACTGCAGAGCCACAGAATACATAATGAAGGGGGTGTACATCA  
ATACTGCCTTACTTAATGCATCTTGTGCAGCAATGGATGATTTCCAATTAATTCCAATGA  
TAAGCAAGTGTAGAACTAAGGAGGGAAGGCGAAAAGACCAACTTGTATGGTTTCATCATA  
AAAGGAAGATCCCCTTAAGGAATGACACCGACGTGGTAAACTTTGTGAGCATGGAGTT  
TTCTCTCACTGACCCAAGACTTGAACCACACAAATGGGAGAAGTACTGTGTTCTTGAGAT  
AGGAGATATGCTTCTAAGAAGTGCCATAGGCCAGGTTTCAAGGCCCATGTTCTTGATGT  
GAGGACAAATGGAACCTCAAAAATTA AAATGAAATGGGGAATGGAGATGAGGCGTTGTC  
TCCTCCAGTCACTTCAACAAATTGAGAGTATGATTGAAGCTGAGTCTCTGTCAAAGAGA  
AAGACATGACCAAAGAGTTCTTTGAGAACAAATCAGAAACATGGCCCATGGAGAGTCT  
CCCAAAGGAGTGGAGGAAAGTTCCATTGGGAAGGTCTGCAGGACTTTATTAGCAAAGTC  
GGTATTTAACAGCTTGTATGCATCTCCACA ACTAGAAGGATTTTCAGCTGAATCAAGAA  
AACTGCTTCTTATCGTTTCAGGCTCTTAGGGACAATCTGGAACCTGGGACCTTTGATCTTG  
GGGGCTATATGAAGCAATTGAGGAGTGCCTAATTAATGATCCCTGGGTTTTGCTTAAT  
GCTTCTTGGTTCAACTCCTTCCTTACACATGCATTGAGTTAGTTGTGGCAGTGCTACTAT  
TTGCTATCCATACTGTCCAAAAAAGTACCTTGTCTTACT

**S4**

AGCAAAGCAGGGGAAAATAAAAACAACCAAATGAAGGCAAACCTACTGGTCTGTTA  
TGTGCACTTGCAGCTGCAGATGCAGACACAATATGTATAGGCTACCATGCGAACAATTCA  
ACCGACACTGTTGACACAGTGTCTCGAGAAGAATGTGACAGTGACACACTCTGTTAACCTG  
CTCGAAGACAGCCACAACGGAAA ACTATGTAGATTA AAAGGAATAGCCCCACTACAATT  
GGGGAATGTAACATCGCCGGATGGCTCTTGGGAAACCCAGAATGCGACCCACTGCTTCC  
AGTGAGATCATGGTCTACATTGTAGAAACACCAA ACTCTGAGAATGGAATATGTTATC

CAGGAGATTTTCATCGACTATGAGGAGCTGAGGGAGCAATTGAGCTCAGTGTCATCATTC  
GAAAGATTTCGAAATATTTCCCAAAGAAAGCTCATGGCCCAACCACAACACAACCAAAGG  
AGTAACGGCAGCATGCTCCCATGCGGGGAAAAGCAGTTTTTACAGAAATTTGCTATGGC  
TGACGGAGAAGGAGGGCTCATACCCAAAGCTGAAAAATTTCTTATGTGAACAAGAAAGG  
AAAGAAGTCCTTGTACTGTGGGGTATTCATCACCCGTCTAACAGTAAGGATCAACAGAA  
TATCTATCAGAATGAAAATGCTTATGTCTCTGTAGTACTTCAAATTATAACAGGAGAT  
TTACCCCGGAAATAGCAGAAAGACCCAAAGTAAGAGATCAAGCTGGGAGGATGAACTAT  
TACTGGACCTTGCTAAAACCCGGAGACACAATAATATTTGAGGCAAATGGAAATCTAAT  
AGCACCAAGGTATGCTTTCGCACTGAGTAGAGGCTTTGGGTCCGGCATCATCACCTCAA  
CGCATCAATGCATGAGTGTAACACGAAGTGTCAAACACCCCTGGGAGCTATAAACAGCA  
GTCTCCCTTTCAGAATATACACCCAGTCACAATAGGAGAGTGCCCAAAATACGTCAGGA  
GTGCCAAATTGAGGATGGTTACAGGACTAAGGAACATTCCGTCCATTCAATCCAGAGGTC  
TATTTGGAGCCATTGCCGGTTTTATTGAAGGGGGATGGACTGGAATGATAGATGGATGG  
TACGGTTATCATCATCAGAATGAACAGGGATCAGGCTATGCAGCGGATCAAAAAAGCAC  
ACAAAATGCCATTAACGGGATTACAAACAAGGTGAACTCTGTTATCGAGAAAATGAACA  
TTCAATTCACAGCTGTGGGTAAAGAATTCAACAAATTAGAAAAAAGGATGGAAAATTTA  
AATAAAAAAGTTGATGATGGATTTCTGGACATTTGGACATATAATGCAGAATTGTTAGT  
TCTACTGGAAAATGAAAGGACTCTGGATTTCCATGACTCAAATGTGAAGAATCTGTATG  
AGAAAGTAAAAAGCCAATTAAGAATAATGCCAAAGAAATCGGAAATGGATGTTTTGAG  
TTCTACCACAAGTGTGACAATGAATGCATGGAAAGTGTAAAGAAATGGGACTTATGATTA  
TCCCAAATATTCAGAAGAGTCAAAGTTGAACAGGGAAAAGGTAGATGGAGTGAAATTGG  
AATCAATGGGGATCTATCAGATTCTGGCGATCTACTCAACTGTGCGCCAGTTCACTGGTGC  
TTTTGGTCTCCCTGGGGGCAATCAGTTTCTGGATGTGTTCTAATGGATCTTTGCAGTGCA  
GAATATGCATCTGAGATTAGAATTTTCAGAAATATGAGGAAAAACACCCTTGTTTCTACT

**S5**

AGCAAAGCAGGGTAGATAATCACTCACTGAGTGACATCAAATCATGGCGTCCCAAGG  
CACCAAACGGTCTTACGAACAGATGGAGACTGATGGAGAACGCCAGAATGCCACTGAAA  
TCAGAGCATCCGTCCGAAAAATGATTGGTGGAAATTGGACGATTCTACATCCAAATGTGC  
ACAGAACTTAAACTCAGTGATTATGAGGGACGGTTGATCCAAAACAGCTTAAACAATAGA  
GAGAATGGTGTCTCTGCTTTTGACGAAAGGAGAAATAAATACCTGGAAGAACATCCCA  
GTGCGGGGAAGGATCCTAAGAAAACCTGGAGGACCTATATACAGAAGAGTAAACGGAAAG  
TGGATGAGAGAACTCATCCTTTATGACAAAGAAGAAATAAGGCGAATCTGGCGCCAAGC  
TAATAATGGTGACGATGCAACGGCTGGTCTGACTCACATGATGATCTGGCATTCCAATTT  
GAATGATGCAACTTATCAGAGGACAAGGGCTCTTGTTTCGCACCCGGAATGGATCCCAGGAT  
GTGCTCTCTGATGCAAGGTTCAACTCTCCCTAGGAGGTCTGGAGCCGAGGTGCTGCAGT  
CAAAGGAGTTGGAACAATGGTGTGGAATTGGTCAGGATGATCAAACGTGGGATCAATG  
ATCGGAACTTCTGGAGGGGTGAGAATGGACGAAAAACAAGAATTGCTTATGAAAGAATG  
TGCAACATTTCTCAAAGGGAAATTTCAAACCTGCTGCACAAAAAGCAATGATGGATCAAGT  
GAGAGAGAGCCGGGACCCAGGGAATGCTGAGTTCGAAGATCTCACTTTTCTAGCACGGTC  
TGCATCATATTGAGAGGGTTCGGTTGCTCACAAAGTCTGCCTGCCTGCCTGTGTGTATGG  
ACCTGCCGTAGCCAGTGGGTACGACTTTGAAAGAGAGGGATACTCTCTAGTCGGAATAG  
ACCCTTTCAGACTGCTTCAAACAGCCAAGTGTACAGCCTAATCAGACCAAATGAGAATC  
CAGCACACAAGAGTCAACTGGTGTGGATGGCATGCCATTCTGCCGATTTGAAGATCTAA  
GAGTATTGAGCTTCATCAAAGGGACGAAGGTGGTCCCAAGAGGGAAGCTTTCCACTAGA  
GGAGTTCAAATTGCTTCCAATGAAAATATGGAGACTATGGAATCAAGTACACTTGAAC  
GAGAAGCAGGTAAGGACCAGAAGTGGAGGAAACACCAATCAACAGAGGG

CATCTGCGGGCCAAATCAGCATAACAACCTACGTTCTCAGTACAGAGAAATCTCCCTTTTG  
ACAGAACAACCGTTATGGCAGCATTCACTGGAATACAGAGGGGAGAACATCTGACATG  
AGGACCGAAATCATAAGGATGATGGAAAGTGCAAGACCAGAAGATGTGTCTTTCCAGGG  
GCGGGGAGTCTTCGAGCTCTCGGACGAAAAGGCAGCGAGCCCGATCGTGCCTTCCTTTGA  
CATGAGTAATGAAGGATCTTATTTCTTCGGAGACAATGCAGAGGAGTACGACAATAAA  
GAAAAATACCCTTGTTTCTACT

**S6**

AGCGAAAGCAGGGGTTTAAAATGAATCCAAATCAGAAAATAATAACCATTGGATCAATC  
TGTCTGGTAGTCGGACTAATTAGCCTAATATTGCAAATAGGGAATATAATCTCAATATG  
GATTAGCCATTCAATTCAAACTGGAAGTCAAACCATACTGGAATATGCAACCAAAAACA  
TCATTACCTATAAAAATAGCACCTGGGTAAAGGACACAACCTTCAGTGATATTAACCGGC  
AATTCATCTCTTTGTCCCATCCGTGGGTGGGCTATATACAGCAAAGACAATAGCATAAGA  
ATTGGTTCCAAAGGAGACGTTTTTGTGATAAGAGAGCCCTTTATTTTCATGTTCTCACTTG  
GAATGCAGGACCTTTTTTCTGACCCAAGGTGCCTTACTGAATGACAGGCATTCAAATGGG  
ACTGTTAAGGACAGAAGCCCTTATAGGGCCTTAATGAGCTGCCCTGTGCGTGAAGCTCCG  
TCCCCGTACAATTC AAGATTTGAATCGGTTGCTTGGTCAGCAAGTGCATGTCATGATGGC  
ATGGGCTGGCTAACAAATCGGAATTT CAGGTCCAGATAATGGAGCAGTGGCTGTATTA  
ATACAACGGCATAATAACTGAAACCATAAAAAGTTGGAGGAAGAAAATATTGAGGACAC  
AAGAGTCTGAATGTGCCTGTGTAATGGTTCATGTTTTACTATAATGACTGATGGCCCG  
AGTGATGGGCTGGCCTCGTACAAAATTTCAAGATCGAAAAGGGGAAGGTTACTAAATC  
AATAGAGTTGAATGCACCTAATTCCTACTATGAGGAATGTTCCCTGTTACCCTGATACCGG  
CAAAGTGATGTGTGTGTCAGAGACAATTGGCATGGTTCGAACCGGCCATGGGTGTCTT  
TCGATCAAAACCTGGATTATCAAATAGGATACATCTGCAGTGGGGTTTTCGGTGACAAC  
CCGCGTCCCAAAGATGGAACAGGCAGCTGTGGTCCAGTGTATGTTGATGGAGCAAACGG  
AGTAAAGGGATTTTCATATAGGTATGGTAATGGTGTTTGGATAGGAAGGACCAAAAAGTC  
ACAGTTCAGACATGGGTTTGAGATGATTTGGGATCCTAATGGATGGACAGAGACTGAT  
AGTAAGTTCTCTGTGAGGCAAGATGTTGTGGCAATGACTGATTGGTCAGGGTATAGCGG  
GAGTTTCGTTCAACATCCTGAGCTAACAGGGCTAGACTGTATAAGGCCGTGCTTCTGGGT  
TGAATTAATCAGGGGACGACCTAAAGAAAAACAATCTGGACTAGTGCAGCAGCATTT  
CTTTTTGTGGCGTGAATAGTGATACTGTAGATTGGTCTTGGCCAGACGGTGCTGAGTTGC  
CATTCACCATTGACAAGTAGTCTGTTCAAAAAACTCCTTGTTTCTACT

**S7**

AGCGAAAGCAGGTAGATATTGAAAGATGAGTCTTCTAACCGAGGTCGAAACGTACGTTT  
TCTCTATCATCCCGTCAGGCCCCCTCAAAGCCGAGATCGCACAGAGACTTGAAGATGTCT  
TTGCAGGGAAGAACACCGATCTTGAGGTTCTCATGGAATGGCTAAAGACAAGACCAATC  
CTGTCACCTCTGACTAAGGGGATTTTAGGATTTGTGTTACGCTCACCGTGCCAGTGAG  
CGAGGACTGCAGCGTAGACGCTTTGTCCAAAATGCCCTTAATGGGAACGGGGATCCAAAT  
AACATGGACAAAGCAGTTAAACTGTATAGGAAGCTCAAGAGGGAGATAACATTCCATGG  
GGCCAAAGAAATCTCACTCAGTTATTCTGCTGGTGCCTTGCCAGTTGTATGGGCCTCAT  
ATACAACAGGATGGGGGCTGTGACCACTGAAGTGGCATTGTCCTGGTATGTGCAACCTG  
TGAACAGATTGCTGACTCCCAGCATCGGTCTCATAGGCAAATGGTGACAACAACCAACCC  
ACTAATCAGACATGAGAACAGAATGGTTTTAGCCAGCACTACAGCTAAGGCTATGGAGC  
AAATGGCTGGATCGAGTGAGCAAGCAGCAGAGGCCATGGAGGTTGCTAGTCAGGCTAGG  
CAAATGGTGAAGCGATGAGAACCATTGGGACTCATCCTAGCTCCAGTGCTGGTCTGAAA  
AATGATCTTCTTGAAAATTTGCAGGCCTATCAGAAACGAATGGGGGTGCAGATGCAACG  
GTTCAAGTGATCCTCTCGCTATTGCCGCAAATATCATTGGGATCTTGCCTTGATATTGT

GGATTCTTGATCGTCTTTTTTTTCAAATGCATTTACCGTCGCTTTAAATACGGACTGAAAG  
GAGGGCCTTCTACGGAAGGAGTGCCAAAGTCTATGAGGGAAGAATATCGAAAGGAACAG  
CAGAGTGCTGTGGATGCTGACGATGGTCATTTTGTGAGCATAGAGCTGGAGTAAAAAC  
TACCTTGTCTACT

**S8**

AGCAAAGCAGGGTGACAAAGACATAATGGATCCAAACACTGTGTCAAGCTTTCAGGTA  
GATTGCTTTCTTTGGCATGTCCGCAAACGAGTTGCAGACCAAGAACTAGGTGATGCCCA  
TTCCTTGATCGGCTTCGCCGAGATCAGAAATCCCTAAGAGGAAGGGGCAGCACTCTTGGT  
CTGGACATCGAGACAGCCACACGTGCTGGAAGCAGATAGTGGAGCGGATTCTGAAAGA  
AGAATCCGATGAGGCACTTAAAATGACCATGGCCTCTGTACCTGCGTCGCGTTACCTAAC  
CGACATGACTCTTGAGGAAATGTCAAGGGAATGGTCCATGCTCATAACCAAGCAGAAAG  
TGGCAGGCCCTCTTTGTATCAGAATGGACCAGGCGATCATGGATAAAAACATCATACTG  
AAAGCGAACTTCAGTGTGATTTTTTGACCGGCTGGAGACTCTAATATTGCTAAGGGCTTTC  
ACCGAAGAGGGAGCAATTGTTGGCGAAATTTACCATTTGCCTTCTCTTCCAGGACATACT  
GCTGAGGATGTCAAAAATGCAGTTGGAGTCTCATCGGAGGACTTGAATGGAATGATAA  
CACAGTTCGAGTCTCTGAACTCTACAGAGATTCGCTTGGAGAAGCAGTAATGAGAATG  
GGAGACCTCCACTCACTCCAAAACAGAAACGAGAAATGGCGGGAACAATTAGGTCAGAA  
GTTTGAAGAAATAAGATGGTTGATTGAAGAAGTGAGACACAACTGAAGGTAACAGAGA  
ATAGTTTTGAGCAAATAACATTTATGCAAGCCTTACATCTATTGCTTGAAGTGGAGCAA  
GAGATAAGAACTTTCTCATTTTCAGCTTATTTAATAATAAAAAACACCCTTGTCTACT

**HIV-1084i**

TGGATGGGTTAATTTACTCCAAGAAAAGGCAAGACATCCTTGATCTGTGGATCTATCAC  
ACACAAGGCTTCTTCCCTGATTGGCAAACACTACACACCGGGACCAGGGGACAGATATCCA  
CTGACCTTTGGATGGTGTCTCAAGCTAGTGCCAGTTGACCCAAGAGAAGTAGAAGAAGCC  
ACTGAAGGAGAGAACAGCTGTTTACTACACCTATGAGCCTGCATGGACTGGAAGATGC  
GGACAGAGAAGTATTAAGGTGGAAGTTTGACAGTCACCTAGCACACAGACACCTGGCCC  
GCGAGCTACATCCGGAGTTTTACAAAGACTGCTGACACAGAAGGGACTTTCCGCTGGGAC  
TTTCCACTGGGGCGTTCCAGGAGGTGTGGTCTGGGCGGGACTGGGGAGTGGCCAGCCCTC  
AGATGCTGCATATAAGCAGCTGCTTTTCGCTTGTACTGGGTCTCTCTAGGTAGACCAGAT  
CTGAGCCCGGGAGCTCTCTGGCTATCTAGGGAACCCACTGCTTAAGCCTCAATAAAGCTT  
GCCTTGAGTGTCTAAGTAGTGTGTGCCGTCTGTTGTGTGACTCTGGTAACTAGAGATC  
CCTCAGACCCGTTGTGGTAGTGTGGAATACTCTAGCAGTGGCGCCGAACAGGGACTTG  
AAAGCGAAAGTAAGACCAGAGGAGATCTCTCGACGCAGGACTCGGCTTGCTGAAGTGCA  
CTCGGCAAGAGGCGAGAGCGGCGGCTGGTGAGTACGCCAAATTTTATTTGACTAGCGGA  
GGCTAGGAGGAGAGAGATGGGTGCGAGAGCGTCAATATTAAGAGGGGAAAAATTAGATA  
AGTGGGAAAAAATTAGGTTAAGGCCAGGGGAAAGAAACATTATATGCTAAAACACTTA  
GTATGGGCAAGCAGGGAGCTGGAAGATTTGCACTTAACCTGGCCTTTTAGAGACATC  
AGAAGGCTGTAAACAAATAATGAAACAGCTACAACCAGCTCTTACAGACAGGAACAGAGG  
AACTTAGATCATTATATAACACAGTAGCAACTCTCTGTTGTGTACATGAAAAGATAGAG  
GTACGAGACACCAAGGAAGCCTTAGACAAAATGGAAGAAGAACAACAAAAGTCAGCA  
AAAAACACAGCAAGCAGAAGCGGCTGACAAAGGAAAGGTCAGTCAAACTATCCTATAG  
TGCAGAATCTCCAAGGGCAAATGGTACACCAGGCCATATCACCGAGAACTCTGAATGCAT  
GGGTAAGTAATAGAGGAGAAGGCTTTCAGCCCAGAGGTAATACCCATGTTTACAGCA  
TTATCAGAAGGAGCCACCCACAAGATTTAAACACCATGTTAAATACAGTGGGGGGACA

TCAAGCAGCCATGCAAATGTTAAAAGATACCATTAATGAGGAGGCTGCAGAATGGGATA  
GGTTACATCCAGTGCATGCAGGGCCTATTGCACCAGGCCAAATAAGAGAACCAAGGGGA  
AGTGACATAGCAGGAECTACTAGTACCCTTCAGGAGCAAATAGCATGGATGACAAATAA  
CCCACCTATTCCAGTAGGAGACATCTATAAAAAGATGGATAATTCTGGGGTTAAATAAAA  
TAGTAAGAATGTATAGCCCTGTCAGCATTTTGGACATAAAAACAAGGACCAAAGAACC  
TTTAGAGACTATGTAGACAGGTTCTTTAAAACCTTTAAGAGCTGAACAGTCTACACAAGA  
GGTAAAAAACTGGATGACAGACACCTTGTGGTCCAAAATGCCAACCCAGATTGTAAGA  
CCATTTTAAGAGCATTAGGAACAGGGGCTACATTAGAAGAGATGATGACAGCATGTCAG  
GGAGTGGGGGGACCTAGCCACAAAGCAAGAGTTTTGGCTGAGGCAATGAGCCAAGCAGG  
CAATACAAATATAATGATGCAGAGAAGCAATTTTAAAGGCCCTAGAAGAATTATTAAT  
GTTTCAACTGTGGCAAGGAGGGGCACATAGCTAGAAATTGCAGGGCCCCCAGGAAAAAG  
GGCTGTTGGAAATGTGGAAAGGAAGGACACCAAATAAAAAGATTGTACTGAGAGGCAGG  
TAATTTTTTAGGGAAAATTTGGCCTTCCCACAAGGGAAGGCCAGGGAATTTCTTCAGA  
ACAGACCAGAGCCAACAGCCCCACCAGCAGAGAGTTTCAGGTTTCGAGGAGACAACCCCG  
CTCCGAAGCAGGAGCCGAACGACAGGGAACCCTTAACTTCCCTCAAATCACTCTTTGGCA  
GCGACCCCTCGTCTCAATAAAAGTAGGGGGCCAAATAAGGGAGGCTCTCTTAGATACAGG  
AGCAGATGATACAGTATTAGAAGACATAAATTTGCCAGGAAAATGGAAACCAAAAATGA  
TAGGAGGAATTGGAGGTTTTATCAAAGTAAGACAGTATGAACAAATACTTATAGAAATT  
TGTGGAAAAAAGGCTATAGGTACAGTATTAGTAGGACCTACCCCTGTCAACATAATTGG  
AAGGAATATGTTGACACAGCTTGGGTGTACACTAAATTTTCCAATTAGTCCCATTGAAA  
CTGTACCAGTAAAATTAAGCCAGGGATGGATGGCCCAAGGGTTAAACAATGGCCATTG  
ACAGAAGAGAAAATAAAAGCATTAAACAGCAATTTGTGAAGACATGGAGAAGGAAGGAA  
AAATTACAAAAATTTGGGCCTGAAAATCCATATAACACTCCAGTATTTGCCATAAAAAAG  
AAGGACAGTACTAAGTGGAGAAAATTAGTAGATTTTCAGGGAACCTCAATAAAAGAACTCA  
AGACTTTTGGGAAGTTCAATTAGGAATACCACACCAGCAGGGTTAAAAAAGAAAAAAT  
CAGTGACAGTGCTGGATGTGGGGGATGCATATTTTTTCAGTTCCTTTAGATGAAAACCTC  
AGGAAATATACTGCATTCACCATACCTAGTATAAACAATGCAGCACCAGGGATTAGATA  
TCAATATAATGTGCTTCCACAGGGATGGAAAGGATCACCAGCAATATTCAGAGTAGCA  
TGACAAAAATCTTAGAGCCCTTTAGGACACAAAATCCAGACATAGTTATCTATCAATAT  
ATGGATGACTTGTATGTAGGATCTGACTTGGAAATAGGGCAACATAGAGCAAAAATAGA  
GAAGTTAAGAGAACATTTATTGAAATGGGGACTCACCACACCAGACAAGAAACATCAGA  
AAGAACCCCATTTCTTTGGATGGGGTATGAACTCCATCCTGACAAATGGACAGTACAGC  
CTATACAGCTGCCAGAAAAGGATAGCTGGACTGTCAATGATATACAGAAGTTAGTGGGA  
AAATTAACCTGGGCAAGTCAGATTTACCCAGGGATTAAGTAAAGCAACTGTGTAACCT  
CCTTAGGGGAGCCAAAGCATTAAACAGACATAGTACCACTGACTGAAGAAGCAGAATTAG  
AATTGGCAGAAAACAGGGAAAATTTTAAAAGAACCAGTACATGGAGTATATTATGACCCA  
TCAAAAGACTTAATAGCTGAAATACAGAAACAGGGGTATGGCCAATGGACATACCAAAT  
TTACCAAGAACCATTCAAAAATCTGAAAACAGGGAAGTATGCAAAAATGAGGACTGCC  
ACACTAATGATGTAAAACAGTTAACAGAGGCAGTGCAAAAATAGCCCTGGAAAAGCATA  
GTAATATGGGGAAAGACTCCTAAATTTAGACTACCCATCCAAAAGACACATGGGAGGC  
ATGGTGGACAGAATATTGGCAAGCCACCTGGATTCTGAATGGGAGTTTGTTAATACCC  
TCTCTAGTAAAATTTAGTACCAGCTGGAGAAAGAACCAATAATAGGAGCAGAAACTT  
TCTATGTAGATGGAGCAGCTAATAGGGAACTAAAGCAGGAAAGGCAGGGTATGTTACT  
GACAAAGGAAGGCAGAAAATCGTTTCTCTAACTGAAACAACAAATCAGAAGGCTGAACT  
ACAAGCAGTTCAGCTAGCTTTGCAGGATTCAGGATTAGAAGTAAACATAGTAACAGACT  
CACAGTATGCCTTAGGAATTATTCAAGCACAACCAGATAAGAGTGAATCAGAATTAGTC

GCTCAGATAATAGAGCAGTTAATAAAAAAGGAAAGGGTCTACCTGTCATGGGTACCAGC  
ACATAAAGGAATTGGAGGAAATGAACAAGTAGATAAATTAGTCAGCAGTGGAAATAAGGA  
AAGTGCTGTTTCTAGATGGAATAGATAAGGCTCAAGAAGACCATGAAAAATATCACAGC  
AATTGGAGAGCAATGGCTAATGAGTTAATCTGCCACCCATAGTAGCAAAAAGAAATAGT  
AGCTAGCTGTGATAAATGTCAACTAAAAGGGGAAGCCATACATGGACAAGTAGACTGTA  
GTCCAGGGATCTGGCAATTAGATTGTACACATTTAGAAGGAAAAATCATCCTGGTAGCA  
GTCCATGTAGCCAGTGGCTACATAGAAGCAGAGGTTATCCCAGCAGAAACAGGACAAGA  
AACAGCATACTACATACTAAAATTAGCAGGAAGATGGCCAGTAAAGGTAATACATACAG  
ATAATGGCAGTAATTTACCAGTGCTGCAGTTAAGGCAGCCTGTTGGTGGGCAGGTATCC  
AACAGGAATTTGGAATCCCCTACAATCCCCAAAGTCAGGGAGTAGTAGAATCCATGAAT  
AAAGAATTAAGAAAATCATAGGGCAGGTAAGAGATCAAGCTGAGCACCTTAAGACAGC  
AGTACAAATGGCAGTATTCATTCACAATTTTAAAAGAAAAGGGGGGATTGGGGGGTACA  
GTGCAGGGGAGAGAATAATAGACATAATAGCAACAGACATACAACTAAAGAATTACAA  
AACCAAATTTTAAAAATTCGAAATTTTCGGGTTTATTACAGAGACAGCAGAGACCCTAT  
TTGGAAGGACCAGCCAACTACTCTGGAAAGGTGAAGGGGCAGTAGTAATACAAGATA  
ATAGTGACATAAAGGTAGTACCAAGGAGGAAAGTAAAAATCATTAAGGACTATGGAAAA  
CAGATGGCAGGTGCTGATTGTGTGGCAGGTAGACAGGATGAGGATTAGAACATGGAATA  
GTTTAGTAAAGCACCATATGTATGTTTCAAAAAGAGCTAATGGATGGTTCTACAGACAT  
CATTTTGAAAGCAGACATCCAAAAGTAAGTTCAGAAGTACACATCCCATTAGGGGATGC  
TAGATTAGTAATAAAAACATATTGGGGTTTGCAGCCAGGAGAAAGAGATTGGCATTGG  
GTCATGGAGTCTCCATAGAATGGAGATTGAAAAGATATAGCACACAAGTAGACCCTGGC  
CTGGCAGACCAACTAATTCATATGCATTATTTTAATTGTTTTGCAGACTCTGCCATAAGG  
AAAGCCATATTAGGACATATAGTTAGCCCTAGGTGTGAATATCAAGCAGGACATAACAA  
GGTAGGATCTCTACAATACTTGGCATTGACAGCGTTGACAAAACCAAAAAAGATAAAGC  
CACCTCTGCCTAGTGTTTCAGAAATTAGTAGAGGATAGATGGAACGAGCCCCAGAAGACC  
AGGGGCCGAGAGGGAACCATACAATGAATGGACACTAGAACTTTTAGAGGAACTCAAG  
CAGGAAGCTGTCAGACACTTTCTAGGCCATGGCTCCATAGCTTAGGACAACATGTCTAT  
GAAACATATGGCGCGCCTTGGACAGGAGTCGAAGTGATAATAAGAATTCTGCAACAATT  
ACTGTTTTATTCATTTTCAGAATTGGGTGCCAGCATAGCAAAATAGGCATTTTGGCAGAGA  
GAAGAGCAAGAAATGGAGCCAATAGATCCTAACTAGAGCCCTGGAATCATCCAGGAAG  
TCAGCCTAAAACCTCCATGTAATAAGTGTTATTGCAAAAGATGCTGCTATCATTGTCTAGT  
TTGCTTTCAGACAAAAGGCTTAGGCATTTCTATGGCAGGAAGAAGCGGAGACAGCGAC  
GCAGTGCTCCTCAAGCAGTGAGGATCATCAAAATTCTATATCAAAGCAGTAAGTACCA  
ATTAGTAGATGTAATGATAGATTTTGCAGCAAGAGTAGATTATAGACTAGGAGTAGGAG  
CATTCATAGTGGCATTAAATCATAGCAATAATTGTGTGGACCATAGTATATATAGAATAT  
AGGAAACTGTTAAGGCAAAGAAAAATAGACTGGTTAATTAAGAATTAGGGAAAGAG  
CAGAAGATAGTGGCAATGAGAGTGAGGGGGATACAGAGGAATTATCCACAATGGTGGAT  
ATGGGGCATCTTAGGCTTCTTAATGATATATAATGGGATGGGGAGCTTGTGGGTACAG  
TCTATTATGGGGTACCTGTGTGGAAGGAAGCAAAAACCTACTCTATTTTGTGCATCAGAT  
GCTAAAGCATATGAGAGAGAAGTGCATAATATCTGGGCTACACATGCCTGTGTACCCAC  
AGACCCCAACCCACAAGAATTGGTCTTGGAAAATGTAACAGAAAATTTTAAACATGTGGA  
AAAATGACATGGTGGATCAGATGCATGAGGATATAATCAGTTTATGGGATCAAAGTCTA  
AAGCCATGTGTAAAGTTGACCCACTCTGTGTCACTTTAAACTGTACAGATGTTAAAAGT  
GCTAATAGTACCAGTGAAGATATGAGAAATTGCTCTTTCAATGTAACCACAGAGAGGAA  
AGATAGAAAAAGCTTGAACAAGCACTTTTTTATAGACTTGACATAGTACCACTTAAGA  
ATAGTAGTTCTAGTAACCTTGTAGTATAGATTAATAAATTGTAATACCTCAACAGTA

TCACAAGCCTGTCCAAAGGTCAATTTTGACCCAATTCCTATACATTATTGTGCTCCAGCT  
GGTTATGCGATTCTAAAGTGTAATAATAAGACATTCATGGATCAGGACCATGCAATAA  
TGTCAGCACAGTACAATGTACACATGGAATTAAGCCAGTAGTGTCAACTCAACTGCTGTT  
AAATGGTAGTCTAGCAGAAGAAGACATAATAATTAGATCTGAAAATTTGACAAACAATG  
TCAAAACAATAATAGTACATCTTAAGGACTATGTAGAAATTTGTATGTACAAGGCCAAC  
AATAATACAAGGAAAAGTATGAGGATAGGACCAGGACAAGCATTCTATGCAACAGGAGA  
AATAATAGGAAATATAAGAGAAGCTCATTGTAACATCAGTGGAAGTAAATGGAATAACA  
CTTTACAAAGGGTAAAGAAAAAATTAGGAGAGCACTTCCCTAATAACACCACAATAGAC  
TTTAAACCATCCTCAGGAGGGGACCTAGAAATTACAACACATAGCTTTAATTGTAGAGG  
AGAATTTTCTATTGCAATACATCAAAATTTGTTAATGGTACATCAGAGTCAAATTCAA  
CCATCACACTCCCATGCAAGATAAAACAAATTATAAACATGTGGCAAGGGGTAGGACGA  
GCAATGTATGCCCTCCCATTGCAGGAAACATAACATGCAAATCAAATATCACAGGACTA  
CTATTAACACGTGATGGAGGAAATGGAAATGGTACAGAGATATTCAGACCGGGAGGAGG  
AGATATGAGGGACAATTGGAGAAGTGAATTATATAAATATAAAGTGGTGAATAATTGAA  
CCATTAGGAATAGCACCCACTAAGGCAAAAAGGAGAGTGGTGGAGAGAGGAAAAAGAGC  
AGTGGGAATAGGAGCTCTGTTCCCTGGGTTCTTGGGAGCAGCAGGAAGCACTATGGGCG  
CGGCGTCACTAACGCTGACGGTACAGGCCAGACAATTATTGTCTGGTATAGTGCAACAGC  
AAAACAATTTGCTGAGGGCTATAGAGGCGCAACAGCATATGTTGCAACTCACGGTCTGG  
GGCATTAAAGCAGCTCCAGGCAAGAGTCTTGGCTATAGAAAGATACCTACAGGATCAACA  
GCTCCTAGGAATTTGGGGCTGCTCTGGAAAACCTCATCTGCACCACTGATGTGCCTTGAA  
CTCTAGTTGGAGTAGTAAATCTTATGAGGACATTTGGACAAATATGACCTGGATGCAGT  
GGGATAAAGAAATTAATAATTACACAAACACAATATATCAGTTGCTTGTAGACTCGCAA  
ACCCAGCAGGAAAAAATGAAAGGGAGTTACTAGCATTGGACAGTTGGAAAAATCTGTG  
GAATTTGGTTAACATAACAAATTTGGCTATGGTATATAAAAATATTCATAATGATAGTAG  
GAGGCTTGATAGTTTAAGAATAATTTTGTGCTGTGCTCTCTATGGTAAATAGAGTTAGG  
CAGGGATACTCACCTCTGTCATTTAGACCCTTACCCCAAACCCGAGGGGACCCGACAGG  
CTCGGAAGAATCGAAGAAGAAGGTGGAGAGCAAGACAGAGACAGATCCATTTCGATTAGT  
GAGCGGATTTCTAGCGCTTGCCTGGGACGACCTGCGGAGCCTGTGCCTTTTCAGCTACCA  
CCGATTGAGAGACTGCATATTGATTGTAGCGAGGGCAGCGGAACTTCTGGGACGCAGCA  
GTCTCAGGGGACTACAGAAGGGGTGGGAAGCCCTTAAGTATCTGGGAAGCCTTGTGCAG  
TATTGGGGTCTAGAGCTAAAAAAGAGTGCTATTAGTCTGCTTGATACCACAGCAATAGC  
AGTAGCTGAAGGAACAGATAGAATTATAAAATTAATACAAAGAATTTGTAGAGCTATCT  
GCAACATACCTAGAAGAATAAGACAGGGCTTTGAAGCAGCTTTGCAATAAAATGGGGGG  
CAAGTGGTCAAAAAGCAGTATAGTTGGATGGCCTGCTGTAAGAGAAAGAATAAGACAAA  
CTGCTCCAGCAGCAACAGGAGTAGGAGCAGCGTCTCAAGACTTAGATACACATGGGGCAC  
TTACAACCAGCAACACAGTTAGCAACAATGCTGATTGTGCCTGGTTGGAAGCACAAGAG  
GAGAAAGACGAGGTAGGCTTTCCAGTCAGACCTCAGGTACCTTTAAGACCAATGACTTA  
TAAGGCAGCATTCGATCTCAGCTTCTTTTAAAAGAAAAGGGGGGACTGGATGGGTAA  
TTTACTCCAAGAAAAGGCAAGACATCCTTGATCTGTGGATCTATCACACACAAGGCTTCT  
TCCCTGATTGGCAAACTACACACCGGGACCAGGGGTGAGATATCCACTGACCTTTGGAT  
GGTGCTTCAAGCTAGTGCCAGTTGACCCAAGGGAAGTAGAAGAAGCCACTGAAGGAGAG  
AACAGCTGTTTACTACACCCTATGAGCCTGCATGGACTGGAAGATGCGGACAGAGAAGT  
ATTAAGGTGGAAGTTTGACAGTCACCTAGCGCACAGACACATGGCCCGGAGCTACATCC  
GGAGTTTACAAAGACTGCTGACACAGAAGGGACTTTCCGCTGGGACTTTCCACTGGGGC  
GTTCCAGGAGGTGTGGTCTGGGCGGGACTGGGGAGTGGCCAGCCCTCAGATGCTGCATAT  
AAGCAGCTGCTTTTCGCTTGTACTGGGTCTCTAGGTAGACCAGATCTGAGCCCGGGAG



CTCTCTGGCTATCTAGGGAACCCACTGCTTAAGCCTCAATAAAGCTTGCCTTGAGTGCTC  
TAAGTAGTGTGTGCCCGTCTGTTGTGTGACTCTGGTAACTAGAGATCCCTCAGACCC
